# Supplementary material for: Identification and Functional Characterization of Tomato CircRNAs Derived from Genes Involved in Fruit Pigment Accumulation
Source: PubMed Central journal article supplement (PMC5561264; doi:10.1038/s41598-017-08806-0), 2017-08-17
Supplement: 41598_2017_8806_MOESM1_ESM.pdf [file 41598_2017_8806_MOESM1_ESM.pdf]

## **Supplementary Material**

### **Identification and Functional Characterization of Tomato CircRNAs Derived from Genes Involved in Fruit Pigment Accumulation**

Jinjuan Tan<sup>1</sup>, Zhongjing Zhou<sup>1</sup>, Yujie Niu<sup>1</sup>, Xiaoyong Sun<sup>2</sup>, Zhiping Deng<sup>1\*</sup>

<sup>1</sup> State Key Laboratory Breeding Base for Zhejiang Sustainable Pest and Disease Control, Institute of Virology and Biotechnology, Zhejiang Academy of Agricultural Sciences, Hangzhou 310021, China

<sup>2</sup> Agricultural Big-Data Research Center, College of Information Science And Engineering, Shandong Agricultural University, Taian, Shandong 271018, China

\*email: zhipingdeng@126.com

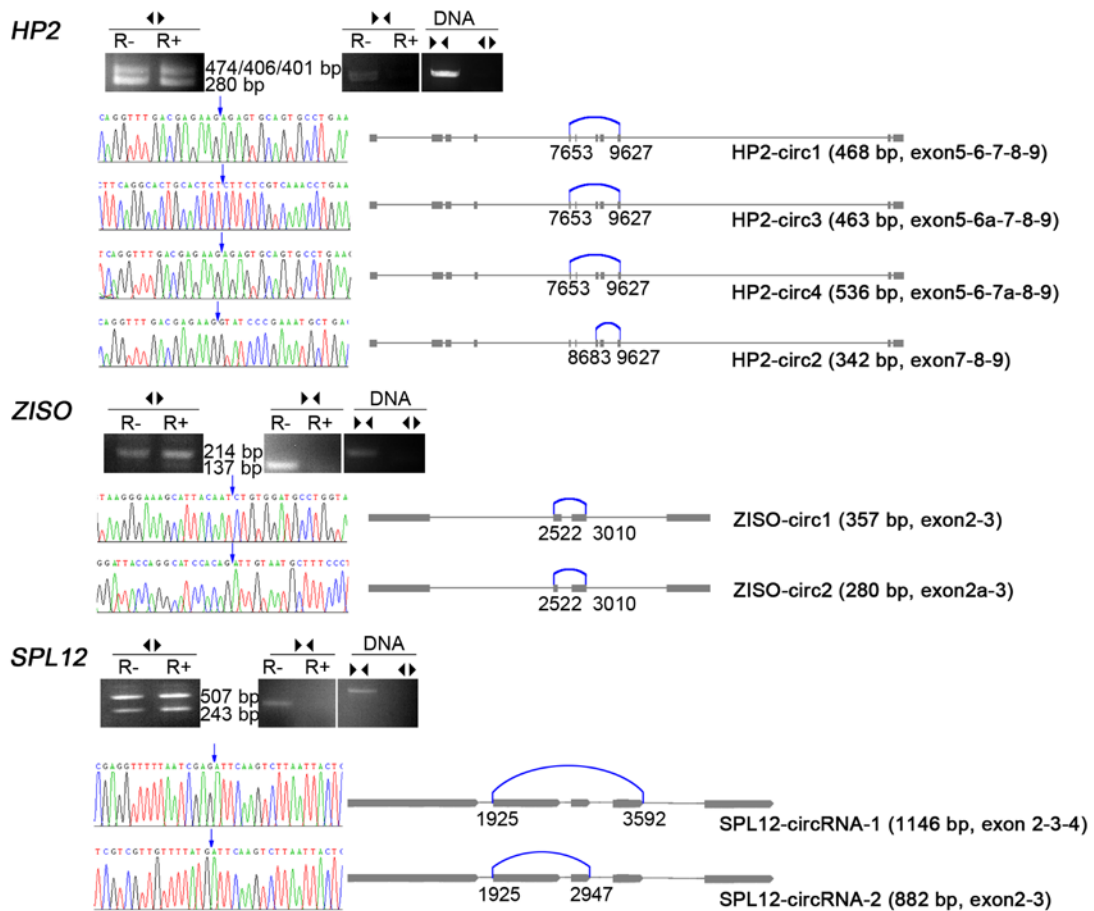

**Supplementary Figure 1 Alternative circularization of circRNAs in tomato fruits.**

Alternative back-splicing circularization referring to different back-splice sites generated from the same gene was molecularly validated and showed in circRNAs derived from *HP2* and *SPL12* genes. Alternative splicing circularization referring to different transcripts with the same back-splice site was molecularly validated and showed in circRNAs derived from *HP2* and *ZISO* genes.

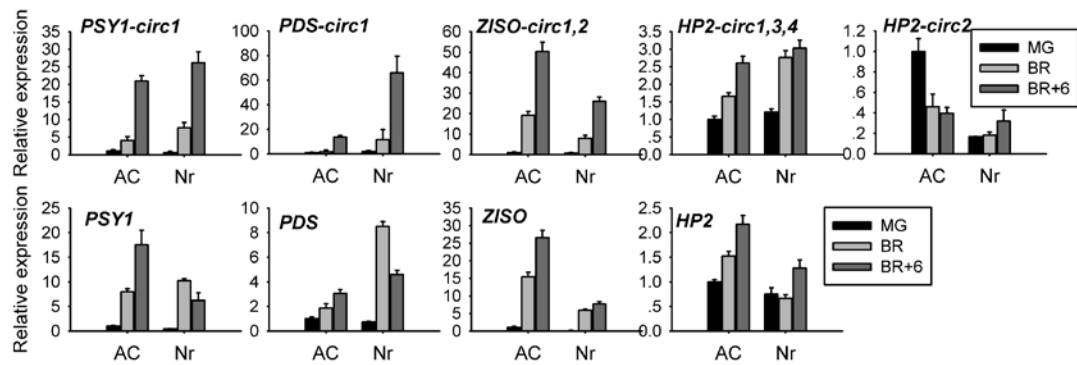

**Supplementary Figure 2** Expression profile of a few circRNAs and their parent genes in Ailsa Craig and *Nr* mutant fruits at different ripening stages. The data were normalized to *Actin* and presented as the means  $\pm$  SD (n=3).

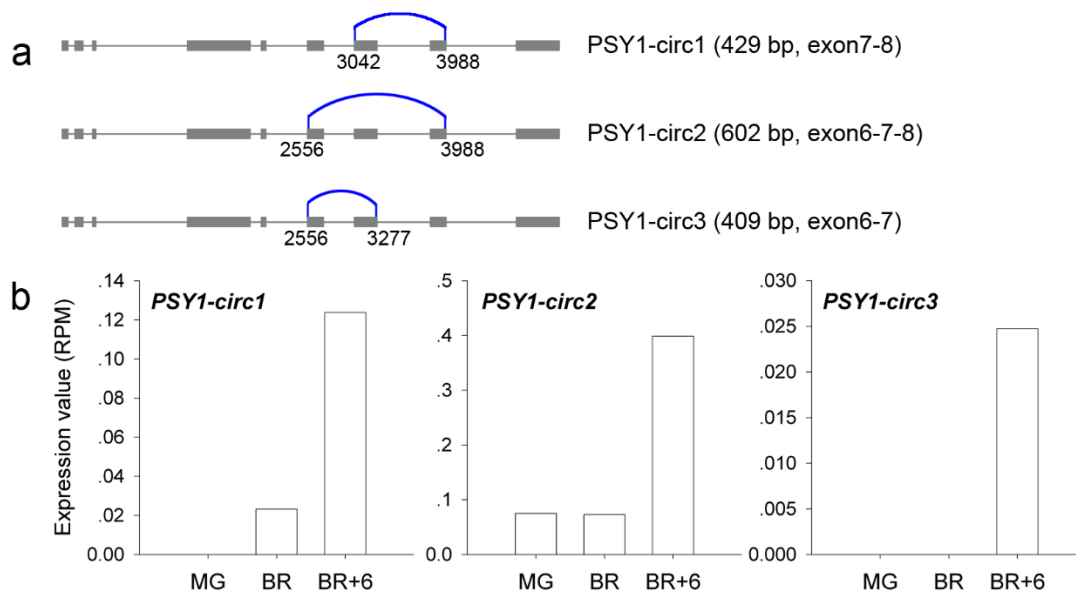

**Supplementary Figure 3 Structure and expression profile of canonical circRNAs derived from *PSY1* calculated from RNA-seq data.** Blue curves indicate canonical back-splice sites. RPM, reads per million mapped reads.

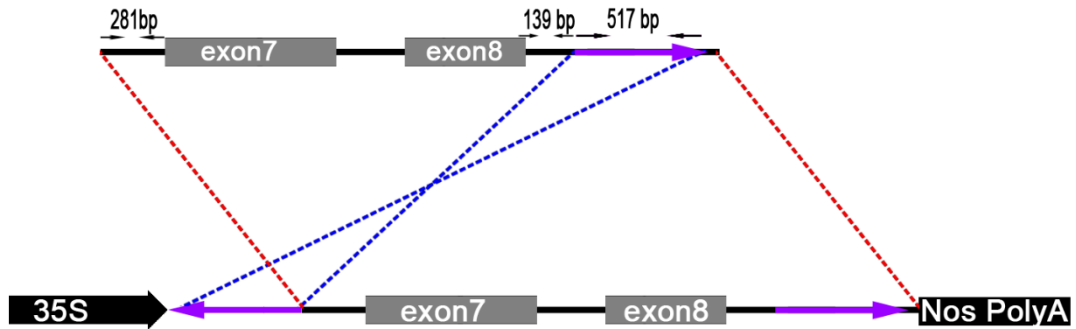

**Supplementary Figure 4 Schematic diagram of vector construction for PSY1-circ1 overexpression.** An intronic fragment (purple arrow) from the downstream flanking intron of the circularized PSY1-circ1 exons were introduced to the upstream flanking sequence in an opposite orientation, then the tandem fragments were introduced to pCAMBIA1301 vector to replace the  *$\beta$ -Glucuronidase (GUS)* gene, which is under drive of the CaMV 35S promoter.

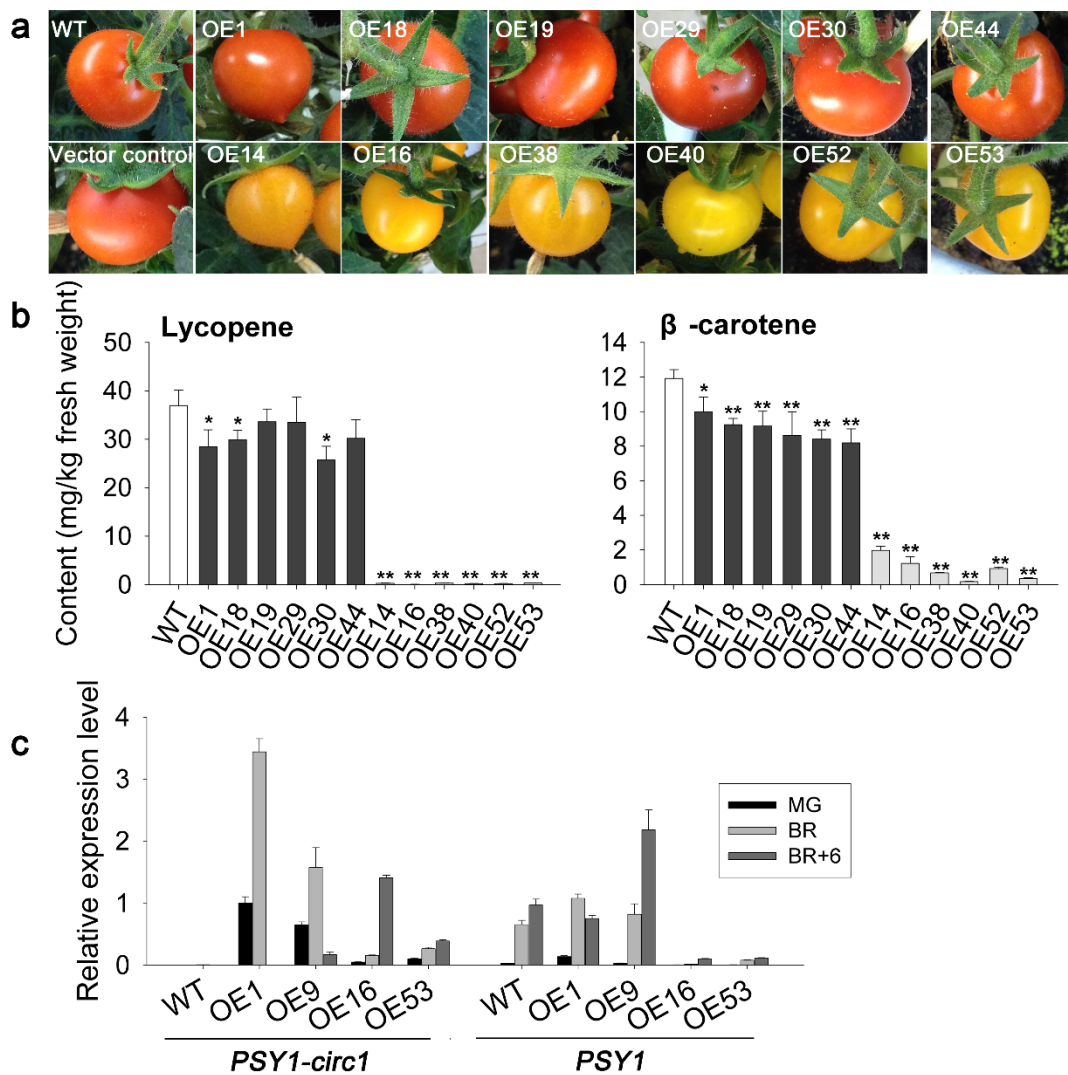

**Supplementary Figure 5 Overexpression of PSY1-circ1 in microTom.** (a) Fruits of different PSY1-circ1 overexpression tomato lines. WT, wild type. OE1-OE53 stand for transgenic lines. Vector control stands for microTom plants transformed with the empty vector pCAMBIA1301. (b) Lycopene and  $\beta$ -carotene contents in transgenic tomato fruits at breaker+10 stage. White, black and gray bars stand for control, transgenic lines with red fruits and yellow fruits respectively. The data with error bars were expressed as mean $\pm$ SEM (n=4), asterisks indicate statistically significant difference (with respect to control; \* $p$  value < 0.05; \*\* $p$  value < 0.01; two-way ANOVA followed by LSD test). (c) Expression profile of PSY1-circ1 and *PSY1* gene in transgenic tomato fruits at different ripening stages. The data were normalized to *Actin* and presented as means  $\pm$  SD (n=5).

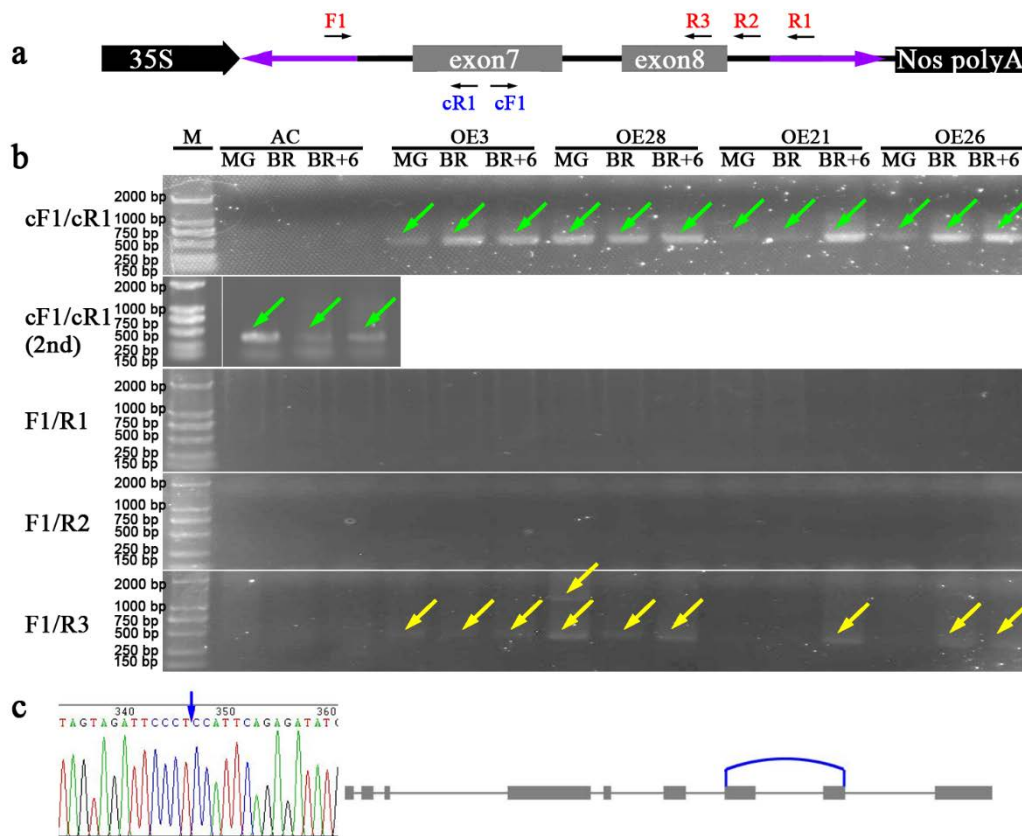

**Supplementary Figure 6 Identification of RNA isoforms generated by PSY1-circ1 overexpressing vector.** (a) Convergent primers F1/R1, F1/R2, and F1/R3 were used for amplification of linear RNAs, and divergent primers cF1/cR1 were used for circular RNA PSY1-circ1 identification. (b) PSY1-circ1 RNAs were successfully amplified in all fruit samples (green arrows), although in Ailsa Craig fruits the PCR products were only visible in the second-round PCR (used ten times diluted 1<sup>st</sup> PCR products as templates), since the first-round products were too low. Linear RNAs were also detected in some transgenic fruits (yellow arrows), but with lower abundance compared to PSY1-circ1. All PCRs were amplified with 35 cycles, and an equal aliquot of cDNA templates was used among PCRs with different primers. (c) Sanger sequencing of PCR products from (b, cF1/cR1) confirmed the back-splice site and structure of PSY1-circ1. The blue arrow and blue curve indicate the back-splice site.

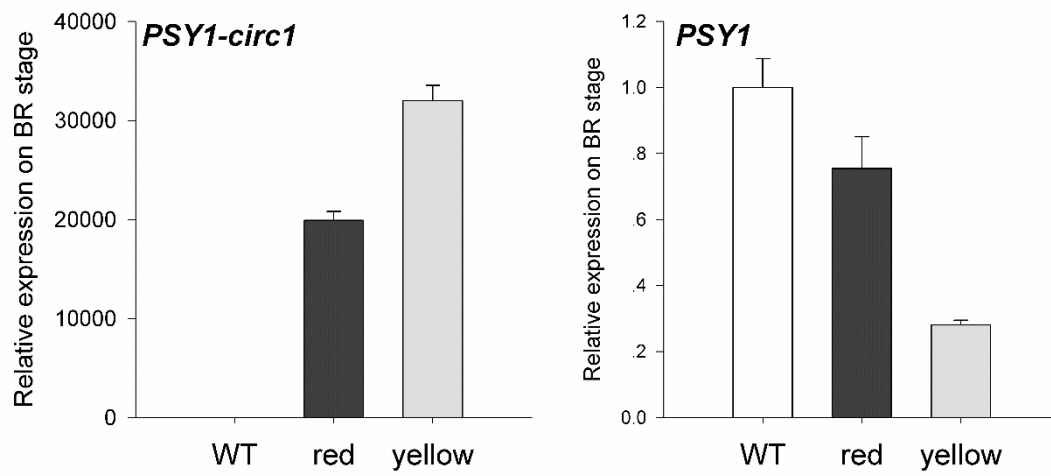

**Supplementary Figure 7 Expression of *PSY1-circ1* and its parent gene *PSY1* in transgenic microTom fruits (T1 generation).** White, black and gray bars represent microTom control (WT), transgenic plants (T1 generation from OE1) with red fruits and yellow fruits. The data were normalized to *Actin* and are presented as the means  $\pm$  SD (n=3).



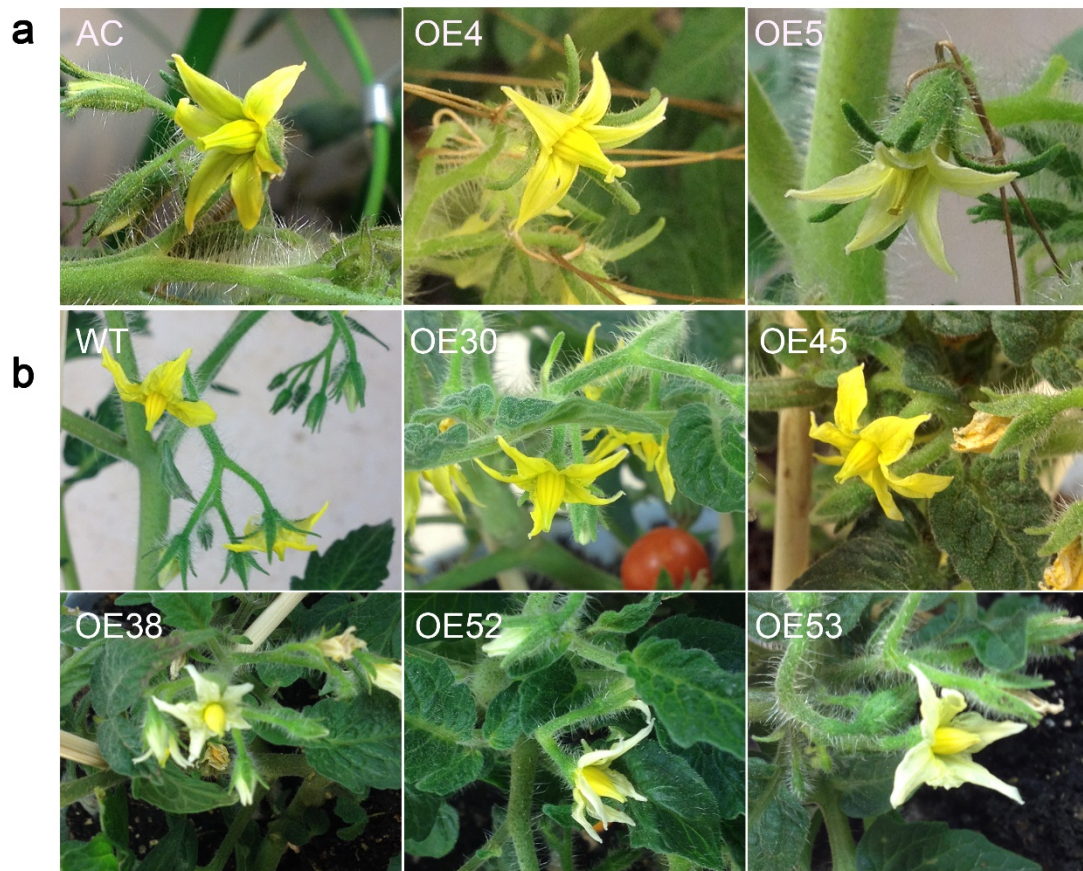

**Supplementary Figure 8 Flowers of some PSY1-circ1 transgenic plants (Ailsa Craig and microTom).** (a) OE4 is a transgenic Ailsa Craig line with yellow petals and red fruits, while OE5 is a transgenic line with white petals and yellow fruits. (b) OE30 and OE45 are transgenic microTom lines with yellow petals and red fruits, while OE38, OE52, and OE53 are transgenic lines with white petals and yellow fruits.

**Supplementary Table 1 Putative circular RNAs identified in this study.** The putative circRNAs identified by both Segemehl and CIRI were listed.

| Chr        | start of junction | end of junction |
|------------|-------------------|-----------------|
| SL2.50ch12 | 64101116          | 64102065        |
| SL2.50ch07 | 238342            | 238913          |
| SL2.50ch01 | 958670            | 964383          |
| SL2.50ch01 | 89425896          | 89429084        |
| SL2.50ch09 | 1601732           | 1604230         |
| SL2.50ch08 | 55342739          | 55343194        |
| SL2.50ch01 | 89006909          | 89008059        |
| SL2.50ch01 | 95428043          | 95428362        |
| SL2.50ch02 | 44391539          | 44392572        |
| SL2.50ch07 | 230400            | 231427          |
| SL2.50ch02 | 54932573          | 54933227        |
| SL2.50ch03 | 48957675          | 48958615        |
| SL2.50ch07 | 210427            | 211962          |
| SL2.50ch07 | 55511490          | 55512517        |
| SL2.50ch08 | 14488119          | 14489541        |
| SL2.50ch08 | 27200728          | 27203344        |
| SL2.50ch08 | 55522642          | 55526314        |
| SL2.50ch01 | 95753450          | 95753772        |
| SL2.50ch07 | 238342            | 238616          |
| SL2.50ch04 | 2475874           | 2478587         |
| SL2.50ch04 | 63131174          | 63131614        |
| SL2.50ch07 | 57180401          | 57180666        |
| SL2.50ch07 | 57180401          | 57181056        |
| SL2.50ch03 | 47811257          | 47813406        |
| SL2.50ch04 | 63077366          | 63077665        |
| SL2.50ch07 | 238342            | 239507          |
| SL2.50ch12 | 4022638           | 4026890         |
| SL2.50ch07 | 10358252          | 10376859        |
| SL2.50ch09 | 1151845           | 1152244         |
| SL2.50ch01 | 1435097           | 1436298         |
| SL2.50ch01 | 6462808           | 6464408         |
| SL2.50ch01 | 56450581          | 56451256        |
| SL2.50ch01 | 80128239          | 80128990        |
| SL2.50ch01 | 96218593          | 96219193        |
| SL2.50ch04 | 25435531          | 25438441        |
| SL2.50ch05 | 29311450          | 29314416        |
| SL2.50ch06 | 3159038           | 3162413         |
| SL2.50ch12 | 12005572          | 12006249        |
| SL2.50ch05 | 45934021          | 45944368        |
| SL2.50ch05 | 45944305          | 45950722        |
| SL2.50ch06 | 35676533          | 35676817        |
| SL2.50ch06 | 39016249          | 39016761        |
| SL2.50ch07 | 238342            | 244716          |
| SL2.50ch07 | 32781216          | 32791781        |
| SL2.50ch08 | 63801024          | 63803144        |
| SL2.50ch10 | 58199700          | 58200682        |
| SL2.50ch11 | 39231669          | 39232094        |
| SL2.50ch12 | 24504743          | 24508130        |
| SL2.50ch12 | 66717368          | 66718592        |
| SL2.50ch00 | 8482082           | 8484045         |
| SL2.50ch04 | 3422619           | 3423369         |
| SL2.50ch05 | 45934021          | 45950722        |
| SL2.50ch06 | 3511784           | 3512526         |
| SL2.50ch08 | 1472887           | 1474735         |

|            |          |          |
|------------|----------|----------|
| SL2.50ch09 | 64524037 | 64526784 |
| SL2.50ch09 | 67723782 | 67724089 |
| SL2.50ch01 | 1337381  | 1337968  |
| SL2.50ch01 | 69463823 | 69473553 |
| SL2.50ch02 | 54045625 | 54048832 |
| SL2.50ch03 | 3785197  | 3786267  |
| SL2.50ch03 | 4459901  | 4460783  |
| SL2.50ch04 | 6174779  | 6176961  |
| SL2.50ch04 | 20803914 | 20805074 |
| SL2.50ch05 | 8869560  | 8872789  |
| SL2.50ch07 | 230400   | 238616   |
| SL2.50ch07 | 54091673 | 54092321 |
| SL2.50ch08 | 54134174 | 54135136 |
| SL2.50ch08 | 58617055 | 58617645 |
| SL2.50ch09 | 12713068 | 12714300 |
| SL2.50ch09 | 67463751 | 67464060 |
| SL2.50ch11 | 6613040  | 6614625  |
| SL2.50ch11 | 31576429 | 31583036 |
| SL2.50ch01 | 39929846 | 39935529 |
| SL2.50ch01 | 77199310 | 77201063 |
| SL2.50ch01 | 79530151 | 79531226 |
| SL2.50ch01 | 80715471 | 80721705 |
| SL2.50ch01 | 83862289 | 83862924 |
| SL2.50ch01 | 88329901 | 88332178 |
| SL2.50ch01 | 89425896 | 89428528 |
| SL2.50ch01 | 96218593 | 96219038 |
| SL2.50ch01 | 98285985 | 98294960 |
| SL2.50ch02 | 52531706 | 52536149 |
| SL2.50ch03 | 4656225  | 4656587  |
| SL2.50ch03 | 70521861 | 70522418 |
| SL2.50ch04 | 50312838 | 50316571 |
| SL2.50ch04 | 58278505 | 58279929 |
| SL2.50ch05 | 1387906  | 1388664  |
| SL2.50ch05 | 22630066 | 22635161 |
| SL2.50ch05 | 22692128 | 22693249 |
| SL2.50ch05 | 64816452 | 64816923 |
| SL2.50ch06 | 63719    | 67191    |
| SL2.50ch07 | 2327176  | 2327639  |
| SL2.50ch07 | 39311827 | 39323602 |
| SL2.50ch07 | 65990926 | 65993353 |
| SL2.50ch08 | 65250628 | 65251280 |
| SL2.50ch09 | 4050455  | 4050853  |
| SL2.50ch09 | 33631019 | 33632615 |
| SL2.50ch09 | 69703827 | 69704828 |
| SL2.50ch10 | 26423257 | 26427890 |
| SL2.50ch11 | 55935173 | 55942126 |
| SL2.50ch00 | 549227   | 551528   |
| SL2.50ch01 | 56464466 | 56478152 |
| SL2.50ch01 | 75867821 | 75868153 |
| SL2.50ch01 | 78830026 | 78831262 |
| SL2.50ch01 | 79409311 | 79410342 |
| SL2.50ch01 | 80628702 | 80629523 |
| SL2.50ch01 | 85239105 | 85240959 |
| SL2.50ch01 | 85763905 | 85766098 |
| SL2.50ch01 | 86512179 | 86512804 |
| SL2.50ch01 | 91286806 | 91287967 |
| SL2.50ch02 | 40464307 | 40466985 |
| SL2.50ch02 | 49700564 | 49701130 |

|            |          |          |
|------------|----------|----------|
| SL2.50ch03 | 56243027 | 56243877 |
| SL2.50ch03 | 62201975 | 62202744 |
| SL2.50ch03 | 63106220 | 63106929 |
| SL2.50ch03 | 63444854 | 63451714 |
| SL2.50ch03 | 69674991 | 69675715 |
| SL2.50ch04 | 35325940 | 35337488 |
| SL2.50ch04 | 62343892 | 62346454 |
| SL2.50ch04 | 64386724 | 64387436 |
| SL2.50ch05 | 2622349  | 2623431  |
| SL2.50ch05 | 4080912  | 4083836  |
| SL2.50ch05 | 9778479  | 9779633  |
| SL2.50ch05 | 65836892 | 65863220 |
| SL2.50ch05 | 65858043 | 65863655 |
| SL2.50ch06 | 84413    | 86695    |
| SL2.50ch06 | 39016249 | 39016565 |
| SL2.50ch07 | 482888   | 484009   |
| SL2.50ch07 | 21578418 | 21580627 |
| SL2.50ch07 | 21578418 | 21593440 |
| SL2.50ch07 | 39311827 | 39327145 |
| SL2.50ch07 | 58598297 | 58600132 |
| SL2.50ch07 | 62096067 | 62096482 |
| SL2.50ch08 | 58130642 | 58131977 |
| SL2.50ch08 | 62854165 | 62857677 |
| SL2.50ch09 | 5105261  | 5106104  |
| SL2.50ch09 | 68472198 | 68472917 |
| SL2.50ch10 | 1445232  | 1446862  |
| SL2.50ch10 | 10719501 | 10720338 |
| SL2.50ch10 | 62750898 | 62752162 |
| SL2.50ch10 | 64409259 | 64410267 |
| SL2.50ch11 | 691678   | 694129   |
| SL2.50ch11 | 9789910  | 9793557  |
| SL2.50ch11 | 38098982 | 38105471 |
| SL2.50ch11 | 52959123 | 52960176 |
| SL2.50ch12 | 40792202 | 40792817 |
| SL2.50ch12 | 53708885 | 53712558 |
| SL2.50ch12 | 64399635 | 64403790 |
| SL2.50ch12 | 66108134 | 66111069 |
| SL2.50ch00 | 10340126 | 10342622 |
| SL2.50ch01 | 1370040  | 1371007  |
| SL2.50ch01 | 36258097 | 36261776 |
| SL2.50ch01 | 56472387 | 56478152 |
| SL2.50ch01 | 69624047 | 69628722 |
| SL2.50ch01 | 75612495 | 75613798 |
| SL2.50ch01 | 77848007 | 77849758 |
| SL2.50ch01 | 81659714 | 81661855 |
| SL2.50ch01 | 83846390 | 83848908 |
| SL2.50ch01 | 86556968 | 86558817 |
| SL2.50ch01 | 90838795 | 90840911 |
| SL2.50ch01 | 97959539 | 97960266 |
| SL2.50ch01 | 98168037 | 98168188 |
| SL2.50ch02 | 4518110  | 4521555  |
| SL2.50ch02 | 20243404 | 20246643 |
| SL2.50ch02 | 35843192 | 35844046 |
| SL2.50ch02 | 38655174 | 38657518 |
| SL2.50ch02 | 48019848 | 48021515 |
| SL2.50ch02 | 48021598 | 48021792 |
| SL2.50ch02 | 51668642 | 51669278 |
| SL2.50ch02 | 54045625 | 54047238 |

|            |          |          |
|------------|----------|----------|
| SL2.50ch03 | 4327521  | 4328953  |
| SL2.50ch03 | 4659439  | 4661614  |
| SL2.50ch03 | 11446124 | 11447307 |
| SL2.50ch03 | 13204581 | 13207936 |
| SL2.50ch03 | 35186044 | 35187019 |
| SL2.50ch03 | 59167210 | 59168413 |
| SL2.50ch03 | 66032747 | 66034299 |
| SL2.50ch04 | 2372079  | 2376972  |
| SL2.50ch04 | 7132219  | 7132546  |
| SL2.50ch04 | 7583297  | 7584866  |
| SL2.50ch04 | 41784452 | 41798922 |
| SL2.50ch04 | 50864864 | 50865328 |
| SL2.50ch04 | 58076013 | 58076614 |
| SL2.50ch04 | 60063512 | 60066327 |
| SL2.50ch04 | 64318664 | 64320196 |
| SL2.50ch04 | 64387040 | 64387436 |
| SL2.50ch05 | 3974975  | 3977801  |
| SL2.50ch05 | 11607742 | 11608482 |
| SL2.50ch05 | 20092602 | 20093576 |
| SL2.50ch05 | 22621180 | 22625501 |
| SL2.50ch05 | 22688256 | 22693249 |
| SL2.50ch06 | 3160960  | 3162413  |
| SL2.50ch06 | 19813189 | 19814983 |
| SL2.50ch06 | 25811982 | 25812584 |
| SL2.50ch06 | 32688949 | 32690149 |
| SL2.50ch07 | 1028873  | 1031229  |
| SL2.50ch08 | 2067344  | 2068198  |
| SL2.50ch08 | 38134953 | 38143425 |
| SL2.50ch08 | 52597389 | 52598271 |
| SL2.50ch08 | 59525965 | 59529636 |
| SL2.50ch09 | 1511373  | 1513107  |
| SL2.50ch09 | 5180204  | 5180590  |
| SL2.50ch09 | 16657456 | 16659160 |
| SL2.50ch09 | 44421911 | 44428732 |
| SL2.50ch09 | 44425933 | 44428732 |
| SL2.50ch09 | 50118267 | 50120093 |
| SL2.50ch09 | 50118428 | 50120093 |
| SL2.50ch09 | 52232372 | 52240992 |
| SL2.50ch10 | 92386    | 93435    |
| SL2.50ch10 | 26423257 | 26425950 |
| SL2.50ch11 | 3111530  | 3112158  |
| SL2.50ch11 | 3486437  | 3487470  |
| SL2.50ch11 | 6210415  | 6211030  |
| SL2.50ch11 | 7250129  | 7250974  |
| SL2.50ch11 | 7975429  | 7977329  |
| SL2.50ch11 | 26363404 | 26364363 |
| SL2.50ch11 | 31559100 | 31561356 |
| SL2.50ch11 | 33338511 | 33342055 |
| SL2.50ch11 | 38103925 | 38105471 |
| SL2.50ch11 | 51716320 | 51717041 |
| SL2.50ch11 | 52588849 | 52589446 |
| SL2.50ch11 | 54550673 | 54551537 |
| SL2.50ch11 | 55761855 | 55764385 |
| SL2.50ch12 | 1829352  | 1830657  |
| SL2.50ch12 | 3356416  | 3356789  |
| SL2.50ch12 | 4689775  | 4692120  |
| SL2.50ch12 | 43042562 | 43045200 |
| SL2.50ch07 | 66924324 | 66925383 |

|            |          |          |
|------------|----------|----------|
| SL2.50ch10 | 393403   | 394744   |
| SL2.50ch04 | 3422764  | 3423369  |
| SL2.50ch05 | 16830716 | 16831649 |
| SL2.50ch05 | 7109423  | 7110418  |
| SL2.50ch07 | 4367529  | 4369821  |
| SL2.50ch06 | 34378624 | 34379233 |
| SL2.50ch02 | 4089484  | 4091023  |
| SL2.50ch12 | 4658515  | 4661158  |
| SL2.50ch01 | 55928143 | 55929350 |
| SL2.50ch03 | 2720567  | 2724338  |
| SL2.50ch05 | 19087698 | 19091131 |
| SL2.50ch06 | 43764289 | 43764808 |
| SL2.50ch06 | 44240777 | 44241611 |
| SL2.50ch07 | 10520963 | 10524742 |
| SL2.50ch09 | 67723517 | 67724089 |
| SL2.50ch10 | 58308755 | 58314713 |
| SL2.50ch10 | 59562047 | 59563404 |
| SL2.50ch12 | 5164094  | 5167332  |
| SL2.50ch01 | 88125455 | 88128447 |
| SL2.50ch01 | 93367456 | 93368439 |
| SL2.50ch02 | 47702068 | 47704681 |
| SL2.50ch03 | 48957675 | 48958181 |
| SL2.50ch04 | 16923096 | 16923456 |
| SL2.50ch04 | 54569894 | 54576288 |
| SL2.50ch05 | 29298869 | 29314416 |
| SL2.50ch06 | 37608020 | 37608275 |
| SL2.50ch07 | 63777493 | 63779564 |
| SL2.50ch07 | 67890741 | 67891151 |
| SL2.50ch08 | 25453816 | 25455622 |
| SL2.50ch08 | 58719803 | 58720231 |
| SL2.50ch10 | 14097625 | 14098018 |
| SL2.50ch10 | 21871504 | 21872211 |
| SL2.50ch10 | 26423257 | 26425893 |
| SL2.50ch10 | 63374224 | 63374810 |
| SL2.50ch11 | 4489225  | 4493646  |
| SL2.50ch11 | 37785891 | 37787454 |
| SL2.50ch11 | 49241833 | 49243434 |
| SL2.50ch11 | 52164260 | 52165291 |
| SL2.50ch12 | 62524504 | 62525340 |
| SL2.50ch01 | 950146   | 952323   |
| SL2.50ch01 | 2881585  | 2882446  |
| SL2.50ch01 | 41410267 | 41411251 |
| SL2.50ch01 | 91734869 | 91736920 |
| SL2.50ch01 | 91899495 | 91901886 |
| SL2.50ch01 | 93195574 | 93198269 |
| SL2.50ch01 | 96337246 | 96340051 |
| SL2.50ch01 | 97801204 | 97801452 |
| SL2.50ch02 | 1275452  | 1276462  |
| SL2.50ch02 | 25128030 | 25128299 |
| SL2.50ch02 | 46351393 | 46352213 |
| SL2.50ch02 | 48938202 | 48939789 |
| SL2.50ch02 | 55233897 | 55235434 |
| SL2.50ch03 | 1681002  | 1687262  |
| SL2.50ch03 | 32481569 | 32501726 |
| SL2.50ch03 | 50080745 | 50081194 |
| SL2.50ch04 | 7376093  | 7380752  |
| SL2.50ch04 | 33536561 | 33538568 |
| SL2.50ch04 | 59880627 | 59884881 |

|            |          |          |
|------------|----------|----------|
| SL2.50ch04 | 61025224 | 61027063 |
| SL2.50ch04 | 63968504 | 63970772 |
| SL2.50ch05 | 45948902 | 45950722 |
| SL2.50ch05 | 54978089 | 54981054 |
| SL2.50ch05 | 65858043 | 65859273 |
| SL2.50ch06 | 3285075  | 3286464  |
| SL2.50ch06 | 32941228 | 32941746 |
| SL2.50ch06 | 44241308 | 44242443 |
| SL2.50ch07 | 6942081  | 6943038  |
| SL2.50ch07 | 10521238 | 10524742 |
| SL2.50ch07 | 21601223 | 21602675 |
| SL2.50ch07 | 53435253 | 53435854 |
| SL2.50ch07 | 58397818 | 58398716 |
| SL2.50ch07 | 59497949 | 59502029 |
| SL2.50ch08 | 14488122 | 14489541 |
| SL2.50ch08 | 54124803 | 54125996 |
| SL2.50ch08 | 54124803 | 54135136 |
| SL2.50ch08 | 58407097 | 58408235 |
| SL2.50ch08 | 59469259 | 59471246 |
| SL2.50ch09 | 1594407  | 1595844  |
| SL2.50ch10 | 2080706  | 2082578  |
| SL2.50ch10 | 26423257 | 26427741 |
| SL2.50ch10 | 62365104 | 62366908 |
| SL2.50ch11 | 39243500 | 39245882 |
| SL2.50ch11 | 41915754 | 41916262 |
| SL2.50ch11 | 43309417 | 43310303 |
| SL2.50ch11 | 48754790 | 48758917 |
| SL2.50ch12 | 1611519  | 1614586  |
| SL2.50ch12 | 53672516 | 53673269 |
| SL2.50ch12 | 53700671 | 53711562 |
| SL2.50ch12 | 65121620 | 65127107 |
| SL2.50ch01 | 70014    | 70628    |
| SL2.50ch01 | 93625    | 96370    |
| SL2.50ch01 | 72321459 | 72325995 |
| SL2.50ch01 | 76660710 | 76662457 |
| SL2.50ch01 | 96218067 | 96218521 |
| SL2.50ch01 | 96218593 | 96218838 |
| SL2.50ch02 | 34504694 | 34507171 |
| SL2.50ch02 | 37246980 | 37248816 |
| SL2.50ch02 | 44414628 | 44417028 |
| SL2.50ch02 | 46421709 | 46424050 |
| SL2.50ch02 | 47819578 | 47820961 |
| SL2.50ch02 | 48328075 | 48328735 |
| SL2.50ch02 | 51851151 | 51851623 |
| SL2.50ch02 | 53774333 | 53774630 |
| SL2.50ch02 | 54242184 | 54242960 |
| SL2.50ch02 | 54948678 | 54949496 |
| SL2.50ch03 | 1366330  | 1367896  |
| SL2.50ch03 | 1367588  | 1367896  |
| SL2.50ch03 | 4656225  | 4657119  |
| SL2.50ch03 | 18205552 | 18206254 |
| SL2.50ch03 | 32497948 | 32501726 |
| SL2.50ch03 | 48954691 | 48958615 |
| SL2.50ch03 | 65492033 | 65492448 |
| SL2.50ch04 | 1405958  | 1408197  |
| SL2.50ch04 | 58075423 | 58076220 |
| SL2.50ch04 | 58278505 | 58282665 |
| SL2.50ch04 | 61423965 | 61424408 |

|            |          |          |
|------------|----------|----------|
| SL2.50ch05 | 1609830  | 1610838  |
| SL2.50ch05 | 2422026  | 2422361  |
| SL2.50ch05 | 3800601  | 3801014  |
| SL2.50ch05 | 5784202  | 5786570  |
| SL2.50ch05 | 9732687  | 9734098  |
| SL2.50ch05 | 29304007 | 29314416 |
| SL2.50ch05 | 59108375 | 59109056 |
| SL2.50ch05 | 65850081 | 65863655 |
| SL2.50ch06 | 35873857 | 35874538 |
| SL2.50ch06 | 41972841 | 41973223 |
| SL2.50ch06 | 41993192 | 41994001 |
| SL2.50ch06 | 43636754 | 43639154 |
| SL2.50ch06 | 46443513 | 46444703 |
| SL2.50ch07 | 10526081 | 10527102 |
| SL2.50ch07 | 21549013 | 21561488 |
| SL2.50ch07 | 63690661 | 63691261 |
| SL2.50ch07 | 63847262 | 63849385 |
| SL2.50ch08 | 51793930 | 51803201 |
| SL2.50ch08 | 55522642 | 55523200 |
| SL2.50ch08 | 56908325 | 56914404 |
| SL2.50ch08 | 59469259 | 59469864 |
| SL2.50ch08 | 59888334 | 59891038 |
| SL2.50ch08 | 60088604 | 60089839 |
| SL2.50ch08 | 60089356 | 60093223 |
| SL2.50ch08 | 62133379 | 62134382 |
| SL2.50ch08 | 65167593 | 65172584 |
| SL2.50ch09 | 802422   | 804823   |
| SL2.50ch09 | 1654384  | 1654610  |
| SL2.50ch09 | 3375762  | 3376180  |
| SL2.50ch09 | 4662997  | 4663797  |
| SL2.50ch09 | 16657784 | 16659160 |
| SL2.50ch09 | 42263225 | 42263978 |
| SL2.50ch09 | 65661120 | 65662030 |
| SL2.50ch09 | 68496300 | 68497532 |
| SL2.50ch09 | 71034252 | 71035810 |
| SL2.50ch10 | 58292365 | 58292868 |
| SL2.50ch11 | 4210343  | 4210799  |
| SL2.50ch11 | 31563054 | 31573242 |
| SL2.50ch11 | 32943437 | 32946305 |
| SL2.50ch11 | 50811334 | 50812180 |
| SL2.50ch12 | 217442   | 217915   |
| SL2.50ch12 | 2065962  | 2066920  |
| SL2.50ch12 | 3566900  | 3567533  |
| SL2.50ch12 | 10409242 | 10410399 |
| SL2.50ch12 | 64401220 | 64403790 |
| SL2.50ch12 | 64996487 | 65000697 |
| SL2.50ch12 | 65188991 | 65189273 |
| SL2.50ch12 | 64171469 | 64172017 |
| SL2.50ch09 | 1500972  | 1503561  |
| SL2.50ch12 | 65475978 | 65476430 |
| SL2.50ch08 | 1276168  | 1277561  |
| SL2.50ch01 | 820898   | 822978   |
| SL2.50ch01 | 86106056 | 86106704 |
| SL2.50ch08 | 25694879 | 25696508 |
| SL2.50ch08 | 54212037 | 54212838 |
| SL2.50ch08 | 60997789 | 60999534 |
| SL2.50ch11 | 5353386  | 5353797  |
| SL2.50ch10 | 1307213  | 1307526  |



|            |          |          |
|------------|----------|----------|
| SL2.50ch01 | 53602896 | 53604870 |
| SL2.50ch03 | 66167869 | 66168990 |
| SL2.50ch06 | 84413    | 88510    |
| SL2.50ch06 | 5405158  | 5406468  |
| SL2.50ch09 | 69300335 | 69300656 |
| SL2.50ch10 | 57048647 | 57051100 |
| SL2.50ch11 | 119413   | 119977   |
| SL2.50ch11 | 723254   | 728197   |
| SL2.50ch11 | 43321339 | 43321664 |
| SL2.50ch12 | 5159090  | 5159623  |
| SL2.50ch12 | 40752081 | 40753680 |
| SL2.50ch01 | 43301186 | 43301878 |
| SL2.50ch01 | 82330208 | 82334863 |
| SL2.50ch01 | 90630990 | 90635761 |
| SL2.50ch02 | 38332994 | 38335216 |
| SL2.50ch02 | 46148680 | 46149442 |
| SL2.50ch02 | 54574060 | 54574355 |
| SL2.50ch03 | 48957675 | 48958466 |
| SL2.50ch03 | 52908503 | 52909510 |
| SL2.50ch03 | 69998505 | 70000400 |
| SL2.50ch05 | 472149   | 472586   |
| SL2.50ch05 | 1098231  | 1100806  |
| SL2.50ch05 | 60506583 | 60509059 |
| SL2.50ch05 | 63150654 | 63150977 |
| SL2.50ch06 | 38408116 | 38409846 |
| SL2.50ch07 | 51886032 | 51886592 |
| SL2.50ch07 | 51978020 | 51978765 |
| SL2.50ch07 | 64404265 | 64405554 |
| SL2.50ch08 | 23794785 | 23795898 |
| SL2.50ch08 | 51704250 | 51705225 |
| SL2.50ch08 | 61380487 | 61381154 |
| SL2.50ch10 | 1064902  | 1065599  |
| SL2.50ch11 | 6414685  | 6415189  |
| SL2.50ch11 | 33341469 | 33342055 |
| SL2.50ch11 | 55455170 | 55455539 |
| SL2.50ch12 | 3819467  | 3820138  |
| SL2.50ch12 | 15390991 | 15391501 |
| SL2.50ch12 | 42547078 | 42548460 |
| SL2.50ch12 | 66775482 | 66778458 |
| SL2.50ch00 | 4305221  | 4305632  |
| SL2.50ch01 | 1224426  | 1225750  |
| SL2.50ch01 | 1291118  | 1291401  |
| SL2.50ch01 | 48396128 | 48396446 |
| SL2.50ch01 | 56475386 | 56478152 |
| SL2.50ch01 | 81359434 | 81360413 |
| SL2.50ch01 | 93676693 | 93678517 |
| SL2.50ch01 | 95189874 | 95191854 |
| SL2.50ch01 | 98292433 | 98294960 |
| SL2.50ch01 | 98358813 | 98359417 |
| SL2.50ch02 | 27234035 | 27234583 |
| SL2.50ch02 | 29565234 | 29573580 |
| SL2.50ch02 | 41368054 | 41369164 |
| SL2.50ch02 | 43284367 | 43285814 |
| SL2.50ch02 | 51188457 | 51190256 |
| SL2.50ch03 | 61668443 | 61670417 |
| SL2.50ch04 | 7583297  | 7584156  |
| SL2.50ch04 | 59779836 | 59780749 |
| SL2.50ch04 | 60233710 | 60234096 |

|            |          |          |
|------------|----------|----------|
| SL2.50ch04 | 61450428 | 61451963 |
| SL2.50ch05 | 5042626  | 5043828  |
| SL2.50ch05 | 23875277 | 23876744 |
| SL2.50ch05 | 61184436 | 61184822 |
| SL2.50ch05 | 63874443 | 63874933 |
| SL2.50ch06 | 1760904  | 1761388  |
| SL2.50ch06 | 37606914 | 37607937 |
| SL2.50ch07 | 976732   | 977512   |
| SL2.50ch07 | 7732585  | 7735844  |
| SL2.50ch07 | 63869552 | 63872708 |
| SL2.50ch08 | 2603215  | 2606808  |
| SL2.50ch08 | 61692684 | 61693435 |
| SL2.50ch08 | 65682545 | 65687123 |
| SL2.50ch09 | 1273900  | 1274403  |
| SL2.50ch09 | 1654611  | 1654980  |
| SL2.50ch09 | 3824966  | 3825169  |
| SL2.50ch10 | 792863   | 795612   |
| SL2.50ch10 | 60588123 | 60588581 |
| SL2.50ch11 | 5545234  | 5546917  |
| SL2.50ch11 | 5964037  | 5965575  |
| SL2.50ch11 | 6099480  | 6100805  |
| SL2.50ch11 | 49276983 | 49277744 |
| SL2.50ch11 | 50612451 | 50613955 |
| SL2.50ch11 | 52222851 | 52223670 |
| SL2.50ch11 | 55113648 | 55115281 |
| SL2.50ch12 | 5163588  | 5167332  |
| SL2.50ch12 | 12005572 | 12008556 |
| SL2.50ch12 | 37883939 | 37888582 |
| SL2.50ch12 | 62109878 | 62110173 |
| SL2.50ch12 | 66507278 | 66512105 |
| SL2.50ch07 | 59218379 | 59220089 |
| SL2.50ch05 | 63418316 | 63419432 |
| SL2.50ch01 | 76660275 | 76660892 |
| SL2.50ch02 | 47800873 | 47805003 |
| SL2.50ch08 | 60425246 | 60425698 |
| SL2.50ch11 | 30393446 | 30396689 |
| SL2.50ch01 | 90619882 | 90622529 |
| SL2.50ch02 | 38096019 | 38097479 |
| SL2.50ch04 | 16923096 | 16925145 |
| SL2.50ch06 | 1805580  | 1806074  |
| SL2.50ch06 | 43176125 | 43177400 |
| SL2.50ch01 | 82777176 | 82780246 |
| SL2.50ch01 | 89729655 | 89733533 |
| SL2.50ch02 | 22716424 | 22718663 |
| SL2.50ch03 | 64059405 | 64060002 |
| SL2.50ch04 | 18259845 | 18272052 |
| SL2.50ch05 | 10050308 | 10055285 |
| SL2.50ch05 | 10063412 | 10066958 |
| SL2.50ch05 | 16810911 | 16813250 |
| SL2.50ch07 | 56496311 | 56496886 |
| SL2.50ch08 | 55522642 | 55528313 |
| SL2.50ch10 | 408375   | 409635   |
| SL2.50ch10 | 10862536 | 10863685 |
| SL2.50ch11 | 53734462 | 53744307 |
| SL2.50ch12 | 37589810 | 37590042 |
| SL2.50ch12 | 53519635 | 53520442 |
| SL2.50ch12 | 66470736 | 66471292 |
| SL2.50ch01 | 35350510 | 35354615 |

|            |          |          |
|------------|----------|----------|
| SL2.50ch01 | 83866611 | 83869250 |
| SL2.50ch01 | 88759973 | 88764323 |
| SL2.50ch01 | 90528374 | 90529066 |
| SL2.50ch01 | 97103363 | 97105089 |
| SL2.50ch02 | 1288194  | 1308248  |
| SL2.50ch02 | 24613596 | 24616154 |
| SL2.50ch02 | 50657274 | 50659209 |
| SL2.50ch03 | 13176287 | 13179618 |
| SL2.50ch03 | 59664353 | 59667292 |
| SL2.50ch03 | 60523573 | 60527185 |
| SL2.50ch03 | 62186809 | 62187576 |
| SL2.50ch03 | 65355537 | 65357605 |
| SL2.50ch04 | 627113   | 627743   |
| SL2.50ch04 | 5362849  | 5363376  |
| SL2.50ch04 | 5962291  | 5964041  |
| SL2.50ch04 | 25067738 | 25068642 |
| SL2.50ch04 | 33533730 | 33538568 |
| SL2.50ch04 | 41770520 | 41772196 |
| SL2.50ch04 | 55653007 | 55654852 |
| SL2.50ch04 | 66230132 | 66232863 |
| SL2.50ch05 | 19101465 | 19105008 |
| SL2.50ch05 | 63350049 | 63350677 |
| SL2.50ch06 | 2044518  | 2047758  |
| SL2.50ch06 | 32768836 | 32770193 |
| SL2.50ch06 | 43791629 | 43792446 |
| SL2.50ch07 | 1268573  | 1269134  |
| SL2.50ch07 | 2441518  | 2441759  |
| SL2.50ch07 | 10375803 | 10376859 |
| SL2.50ch07 | 64249019 | 64250668 |
| SL2.50ch08 | 25491703 | 25492378 |
| SL2.50ch08 | 55522642 | 55526071 |
| SL2.50ch08 | 61288390 | 61289042 |
| SL2.50ch09 | 2755542  | 2760130  |
| SL2.50ch09 | 3556710  | 3569693  |
| SL2.50ch09 | 64197764 | 64198629 |
| SL2.50ch09 | 70260435 | 70265364 |
| SL2.50ch10 | 92386    | 93935    |
| SL2.50ch10 | 208225   | 208693   |
| SL2.50ch10 | 58624104 | 58625733 |
| SL2.50ch11 | 3356043  | 3356413  |
| SL2.50ch11 | 7831727  | 7832592  |
| SL2.50ch11 | 55193423 | 55194347 |
| SL2.50ch12 | 3472364  | 3473572  |
| SL2.50ch12 | 37739240 | 37739821 |
| SL2.50ch01 | 80715471 | 80721707 |
| SL2.50ch01 | 90605614 | 90607989 |
| SL2.50ch09 | 67723512 | 67724089 |
| SL2.50ch11 | 55524913 | 55525902 |
| SL2.50ch11 | 53736751 | 53741379 |
| SL2.50ch01 | 90630990 | 90633168 |
| SL2.50ch09 | 72086110 | 72089608 |
| SL2.50ch01 | 90947891 | 90950791 |
| SL2.50ch04 | 55751401 | 55752727 |
| SL2.50ch07 | 977078   | 977512   |
| SL2.50ch07 | 10523474 | 10525759 |
| SL2.50ch08 | 64142078 | 64143336 |
| SL2.50ch09 | 1500972  | 1503099  |
| SL2.50ch09 | 33689613 | 33691770 |

|            |          |          |
|------------|----------|----------|
| SL2.50ch11 | 41541444 | 41543579 |
| SL2.50ch11 | 49247210 | 49248279 |
| SL2.50ch01 | 1695810  | 1697212  |
| SL2.50ch03 | 4328007  | 4328953  |
| SL2.50ch03 | 61828193 | 61829642 |
| SL2.50ch03 | 69945580 | 69948922 |
| SL2.50ch07 | 59014613 | 59015192 |
| SL2.50ch08 | 58401946 | 58405621 |
| SL2.50ch08 | 58606436 | 58607082 |
| SL2.50ch09 | 62488802 | 62490152 |
| SL2.50ch10 | 11326837 | 11327338 |
| SL2.50ch12 | 4533376  | 4533872  |
| SL2.50ch01 | 13177    | 13661    |
| SL2.50ch01 | 56472387 | 56475756 |
| SL2.50ch01 | 80404610 | 80411443 |
| SL2.50ch01 | 96699865 | 96700805 |
| SL2.50ch02 | 25127863 | 25128299 |
| SL2.50ch02 | 53580399 | 53581188 |
| SL2.50ch03 | 52969572 | 52972893 |
| SL2.50ch03 | 68944514 | 68945013 |
| SL2.50ch04 | 62793474 | 62797977 |
| SL2.50ch05 | 1387522  | 1388010  |
| SL2.50ch05 | 6708895  | 6711557  |
| SL2.50ch05 | 60344954 | 60349570 |
| SL2.50ch06 | 40776441 | 40779461 |
| SL2.50ch07 | 56332486 | 56335535 |
| SL2.50ch08 | 6990847  | 6991816  |
| SL2.50ch10 | 63788551 | 63789351 |
| SL2.50ch11 | 36507684 | 36510824 |
| SL2.50ch12 | 2352797  | 2354696  |
| SL2.50ch12 | 66578393 | 66578819 |
| SL2.50ch01 | 81898868 | 81899402 |
| SL2.50ch01 | 84289805 | 84290540 |
| SL2.50ch01 | 87477286 | 87482023 |
| SL2.50ch01 | 92232690 | 92235858 |
| SL2.50ch02 | 44770475 | 44772818 |
| SL2.50ch02 | 54932573 | 54932950 |
| SL2.50ch04 | 65620535 | 65625927 |
| SL2.50ch05 | 46228872 | 46234509 |
| SL2.50ch06 | 71344    | 73717    |
| SL2.50ch06 | 31181398 | 31183175 |
| SL2.50ch06 | 48983142 | 48984276 |
| SL2.50ch07 | 4200218  | 4201053  |
| SL2.50ch07 | 21389876 | 21391076 |
| SL2.50ch08 | 1472887  | 1480923  |
| SL2.50ch08 | 55522642 | 55525092 |
| SL2.50ch09 | 2755542  | 2762584  |
| SL2.50ch09 | 31893586 | 31896198 |
| SL2.50ch09 | 31896266 | 31896797 |
| SL2.50ch11 | 10033364 | 10034334 |
| SL2.50ch12 | 1611519  | 1615179  |
| SL2.50ch12 | 1620849  | 1624951  |
| SL2.50ch12 | 29110650 | 29111090 |
| SL2.50ch12 | 66108134 | 66110253 |
| SL2.50ch01 | 1122379  | 1122719  |
| SL2.50ch01 | 13979184 | 13979678 |
| SL2.50ch01 | 54560020 | 54568676 |
| SL2.50ch01 | 88125455 | 88126083 |

|            |          |          |
|------------|----------|----------|
| SL2.50ch02 | 34384699 | 34388946 |
| SL2.50ch02 | 38287222 | 38287866 |
| SL2.50ch02 | 42799160 | 42799339 |
| SL2.50ch02 | 44817076 | 44817429 |
| SL2.50ch02 | 46850433 | 46852137 |
| SL2.50ch03 | 3009332  | 3010131  |
| SL2.50ch03 | 8201277  | 8203496  |
| SL2.50ch03 | 55183863 | 55197548 |
| SL2.50ch03 | 62197202 | 62199662 |
| SL2.50ch03 | 65242618 | 65243396 |
| SL2.50ch03 | 66803073 | 66803827 |
| SL2.50ch03 | 69770063 | 69773085 |
| SL2.50ch03 | 70637392 | 70641648 |
| SL2.50ch04 | 2264722  | 2270861  |
| SL2.50ch04 | 18195180 | 18195633 |
| SL2.50ch04 | 45321116 | 45322667 |
| SL2.50ch04 | 60108702 | 60109162 |
| SL2.50ch05 | 5225922  | 5227056  |
| SL2.50ch05 | 65691748 | 65693428 |
| SL2.50ch06 | 34134687 | 34135147 |
| SL2.50ch06 | 42528895 | 42538395 |
| SL2.50ch06 | 43174977 | 43177400 |
| SL2.50ch06 | 43254780 | 43256242 |
| SL2.50ch06 | 43638262 | 43641934 |
| SL2.50ch06 | 48027396 | 48028196 |
| SL2.50ch07 | 3730434  | 3737549  |
| SL2.50ch07 | 6949732  | 6950824  |
| SL2.50ch07 | 7668400  | 7669088  |
| SL2.50ch07 | 21208786 | 21210064 |
| SL2.50ch07 | 65842911 | 65843684 |
| SL2.50ch08 | 54720018 | 54720661 |
| SL2.50ch08 | 58407097 | 58409623 |
| SL2.50ch09 | 5793547  | 5793920  |
| SL2.50ch09 | 22837104 | 22837779 |
| SL2.50ch09 | 31113070 | 31127995 |
| SL2.50ch09 | 40063351 | 40066414 |
| SL2.50ch09 | 48789677 | 48790242 |
| SL2.50ch09 | 67151648 | 67155803 |
| SL2.50ch10 | 890903   | 892387   |
| SL2.50ch10 | 3051159  | 3051822  |
| SL2.50ch10 | 18504927 | 18515676 |
| SL2.50ch11 | 6614010  | 6614625  |
| SL2.50ch11 | 25025604 | 25026201 |
| SL2.50ch11 | 52805479 | 52805944 |
| SL2.50ch12 | 61932127 | 61933038 |
| SL2.50ch12 | 62055340 | 62055807 |
| SL2.50ch12 | 64996487 | 65000252 |
| SL2.50ch12 | 66004439 | 66005898 |
| SL2.50ch12 | 66212221 | 66216669 |
| SL2.50ch01 | 83846390 | 83847922 |
| SL2.50ch01 | 90605614 | 90612102 |
| SL2.50ch03 | 30990    | 32428    |
| SL2.50ch08 | 46339680 | 46340152 |
| SL2.50ch04 | 6532541  | 6534728  |
| SL2.50ch12 | 66127788 | 66128276 |
| SL2.50ch01 | 94484383 | 94487046 |
| SL2.50ch02 | 49623047 | 49623805 |
| SL2.50ch04 | 60065839 | 60066532 |

|            |          |          |
|------------|----------|----------|
| SL2.50ch07 | 68007493 | 68010577 |
| SL2.50ch12 | 65128136 | 65129767 |
| SL2.50ch01 | 89492725 | 89493458 |
| SL2.50ch01 | 89730975 | 89733533 |
| SL2.50ch06 | 36729690 | 36734553 |
| SL2.50ch08 | 60432213 | 60433729 |
| SL2.50ch09 | 69299833 | 69300656 |
| SL2.50ch10 | 46300785 | 46302324 |
| SL2.50ch01 | 673286   | 676121   |
| SL2.50ch01 | 81306099 | 81308949 |
| SL2.50ch02 | 43124517 | 43125172 |
| SL2.50ch02 | 49502888 | 49503487 |
| SL2.50ch03 | 68944597 | 68945013 |
| SL2.50ch07 | 10523453 | 10527102 |
| SL2.50ch08 | 58926211 | 58927066 |
| SL2.50ch09 | 67135125 | 67136390 |
| SL2.50ch12 | 10201277 | 10203029 |
| SL2.50ch01 | 82651832 | 82654137 |
| SL2.50ch01 | 87427188 | 87427482 |
| SL2.50ch01 | 88165816 | 88166171 |
| SL2.50ch02 | 23574028 | 23583508 |
| SL2.50ch03 | 976173   | 979129   |
| SL2.50ch03 | 24749210 | 24749624 |
| SL2.50ch03 | 64453761 | 64456536 |
| SL2.50ch03 | 70459987 | 70461341 |
| SL2.50ch04 | 358448   | 358951   |
| SL2.50ch04 | 65406403 | 65406865 |
| SL2.50ch05 | 2577529  | 2579535  |
| SL2.50ch05 | 58563460 | 58564809 |
| SL2.50ch07 | 21578418 | 21593436 |
| SL2.50ch07 | 67546087 | 67547159 |
| SL2.50ch08 | 25829679 | 25831964 |
| SL2.50ch08 | 64305831 | 64306523 |
| SL2.50ch10 | 1889965  | 1891454  |
| SL2.50ch10 | 14126858 | 14128072 |
| SL2.50ch10 | 58507010 | 58507991 |
| SL2.50ch11 | 49473872 | 49476376 |
| SL2.50ch12 | 48120404 | 48122121 |
| SL2.50ch01 | 75014690 | 75015790 |
| SL2.50ch01 | 75465377 | 75468823 |
| SL2.50ch01 | 81659771 | 81661855 |
| SL2.50ch01 | 90949911 | 90950791 |
| SL2.50ch01 | 93092828 | 93094156 |
| SL2.50ch02 | 1284294  | 1289542  |
| SL2.50ch02 | 51010954 | 51012186 |
| SL2.50ch03 | 2927940  | 2932099  |
| SL2.50ch03 | 4967203  | 4969713  |
| SL2.50ch03 | 56799637 | 56801379 |
| SL2.50ch04 | 2939441  | 2942441  |
| SL2.50ch04 | 7376097  | 7380752  |
| SL2.50ch04 | 29416785 | 29420401 |
| SL2.50ch04 | 41784452 | 41785026 |
| SL2.50ch06 | 76764    | 80638    |
| SL2.50ch06 | 45900772 | 45902417 |
| SL2.50ch07 | 61913265 | 61919613 |
| SL2.50ch08 | 64146684 | 64148175 |
| SL2.50ch10 | 19704196 | 19706313 |
| SL2.50ch10 | 49988106 | 49993179 |

|            |          |          |
|------------|----------|----------|
| SL2.50ch10 | 58658191 | 58659219 |
| SL2.50ch11 | 5534827  | 5535370  |
| SL2.50ch11 | 7981451  | 7983985  |
| SL2.50ch11 | 33971742 | 33972203 |
| SL2.50ch11 | 52742483 | 52744792 |
| SL2.50ch12 | 3437518  | 3437863  |
| SL2.50ch12 | 26607299 | 26611856 |
| SL2.50ch12 | 61691393 | 61691682 |
| SL2.50ch01 | 3098317  | 3098878  |
| SL2.50ch01 | 55928143 | 55931501 |
| SL2.50ch01 | 72325238 | 72325995 |
| SL2.50ch01 | 76871263 | 76871888 |
| SL2.50ch01 | 89821301 | 89826056 |
| SL2.50ch01 | 92249361 | 92253835 |
| SL2.50ch01 | 92872760 | 92881110 |
| SL2.50ch02 | 22862344 | 22864338 |
| SL2.50ch02 | 52183957 | 52188681 |
| SL2.50ch03 | 3511408  | 3516225  |
| SL2.50ch03 | 53126735 | 53127804 |
| SL2.50ch03 | 69952270 | 69953293 |
| SL2.50ch04 | 209926   | 210329   |
| SL2.50ch04 | 1208879  | 1214277  |
| SL2.50ch05 | 534133   | 534597   |
| SL2.50ch05 | 10082545 | 10089432 |
| SL2.50ch06 | 15696210 | 15697299 |
| SL2.50ch06 | 37606914 | 37607781 |
| SL2.50ch06 | 40863584 | 40864081 |
| SL2.50ch06 | 45008998 | 45009354 |
| SL2.50ch06 | 46282005 | 46282353 |
| SL2.50ch06 | 49661667 | 49666403 |
| SL2.50ch07 | 279900   | 286050   |
| SL2.50ch07 | 2482147  | 2491155  |
| SL2.50ch07 | 7408758  | 7411930  |
| SL2.50ch07 | 64111958 | 64112701 |
| SL2.50ch08 | 1583168  | 1584778  |
| SL2.50ch08 | 2379362  | 2381616  |
| SL2.50ch10 | 468727   | 469595   |
| SL2.50ch10 | 1081541  | 1086146  |
| SL2.50ch10 | 2411566  | 2413051  |
| SL2.50ch10 | 40326425 | 40327209 |
| SL2.50ch10 | 58609556 | 58611315 |
| SL2.50ch10 | 61947171 | 61948408 |
| SL2.50ch11 | 8422662  | 8422939  |
| SL2.50ch11 | 53734462 | 53741997 |
| SL2.50ch12 | 29122638 | 29127812 |
| SL2.50ch12 | 47338038 | 47338869 |

**Supplementary Table 2 Molecularly identified circRNAs in Ailsa Craig fruits**

| Gene name    | Circle length (bp) | Identical to bioinformatic prediction | Splicing pattern | Cyclized exons*              | circRNA name |
|--------------|--------------------|---------------------------------------|------------------|------------------------------|--------------|
| <i>ETR1</i>  | 962                | Yes                                   | Canonical        | exon 3-4-5-6                 |              |
|              | 766                | No                                    | Non-canonical    | exon 3a-4-5-6a               |              |
| <i>ETR3</i>  | 764                | Yes                                   | Canonical        | exon 5-6-7                   |              |
|              | 594                | No                                    | Non-canonical    | exon 5a-6-7a                 |              |
|              | 636                | No                                    | Canonical        | exon 5-6                     |              |
| <i>ETR4</i>  | 544                | No                                    | Non-canonical    | exon 2a-3a                   | ETR4-circ1   |
|              | 199                | No                                    | Non-canonical    | exon 2b-3b                   | ETR4-circ2   |
| <i>EIL3</i>  | 481                | No                                    | Non-canonical    | exon 2a-2a                   |              |
|              | 240                | No                                    | Non-canonical    | exon 2b-2b                   |              |
|              | 433                | No                                    | Non-canonical    | exon 2c-2c                   |              |
| <i>JERF1</i> | 619                | No                                    | Non-canonical    | exon 1a-2a                   |              |
|              | 449                | No                                    | Non-canonical    | exon 1b-2b                   |              |
|              | 340                | No                                    | Non-canonical    | exon 1c-2c                   |              |
|              | 353                | No                                    | Non-canonical    | exon 1d-2d                   |              |
| <i>ACO6</i>  | 652                | No                                    | Non-canonical    | exon 2a-3-4a                 | ACO6-circ1   |
|              | 531                | No                                    | Non-canonical    | exon 1a-2-3a                 | ACO6-circ2   |
|              | 401                | No                                    | Non-canonical    | exon 2b-3b                   | ACO6-circ3   |
|              | 311                | No                                    | Non-canonical    | exon 2c-3c                   | ACO6-circ4   |
| <i>CNR</i>   | 90                 | No                                    | Non-canonical    | exon 3a-3a                   |              |
|              | 69                 | No                                    | Non-canonical    | exon 3b-3b                   |              |
|              | 281                | No                                    | Non-canonical    | exon 2a-3c                   |              |
| <i>NAC3</i>  | 314                | No                                    | Non-canonical    | exon 2a-3a                   |              |
| <i>SPL1</i>  | 644                | No                                    | Canonical        | exon 2a-3                    |              |
|              | 736                | No                                    | Canonical        | exon 2-3                     |              |
|              | 858                | Yes                                   | Canonical        | exon 3-4-5-6                 |              |
| <i>SPL12</i> | 1146               | Yes                                   | Canonical        | exon 2-3-4                   | SPL12-circ1  |
|              | 882                | No                                    | Canonical        | exon 2-3                     | SPL12-circ2  |
| <i>PSY1</i>  | 316                | No                                    | Non-canonical    | exon 8a-9a                   |              |
|              | 227                | No                                    | Non-canonical    | exon 8b-9b                   |              |
|              | 270                | No                                    | Non-canonical    | exon 7a-8-9c                 |              |
|              | 316                | No                                    | Non-canonical    | exon 8c-9d                   |              |
|              | 429                | Yes                                   | Canonical        | exon 7-8                     | PSY1-circ1   |
|              | 405                | No                                    | Non-canonical    | exon 6a-7-8d                 |              |
|              | 510                | No                                    | Non-canonical    | exon 5a-6-7-8e               |              |
| <i>PDS</i>   | 406                | No                                    | Non-canonical    | exon 7a-8-9-10a              |              |
|              | 600                | No                                    | Non-canonical    | exon 6a-7-8-9-10b            |              |
|              | 309                | No                                    | Non-canonical    | exon 7b-8-9a                 |              |
|              | 545                | No                                    | Non-canonical    | exon 6b-7-8-9-10c            |              |
|              | 996                | No                                    | Non-canonical    | exon 6-7-8-9-10-11-12-13-14a |              |
|              | 645                | No                                    | Non-canonical    | exon 6c-7-8-9-10d            |              |
|              | 571                | No                                    | Non-canonical    | exon 6-7-8-9-10e             |              |
|              | 515                | No                                    | Non-canonical    | exon 6d-7-8-9-10f            |              |
|              | 763                | No                                    | Non-canonical    | exon 4a-5-6-7-8-9-10g        |              |
| 483          | Yes                | Canonical                             | exon 6-7-8-9     | PDS-circ1                    |              |
| <i>HP2</i>   | 468                | Yes                                   | Canonical        | exon 5-6-7-8-9               | HP2-circ1    |
|              | 342                | No                                    | Canonical        | exon 7-8-9                   | HP2-circ2    |
|              | 463                | Yes                                   | Canonical        | exon 5-6a-7-8-9              | HP2-circ3    |
|              | 536                | Yes                                   | Canonical        | exon 5-6-7a-8-9              | HP2-circ4    |
| <i>ZISO</i>  | 357                | Yes                                   | Canonical        | exon 2-3                     | ZISO-circ1   |
|              | 280                | Yes                                   | Canonical        | exon 2a-3                    | ZISO-circ2   |



|             |     |    |               |                 |
|-------------|-----|----|---------------|-----------------|
| <i>HP1</i>  | 387 | No | Non-canonical | exon 18a-18a    |
| <i>CCD1</i> | 249 | No | Non-canonical | exon 12a-13-14a |
|             | 440 | No | Non-canonical | exon 12b-13-14b |

\*: Lowercase a-g indicates alternative splicing sites

**Supplementary Table 3 Circular RNAs derived from PSY1 gene**

| Samples | Type          | Name       | Back-splice site                                                                                                                                                                                                                                                                                                                                                                                                                                                                                 | POS1    | POS2    | INF                      | RPM   |
|---------|---------------|------------|--------------------------------------------------------------------------------------------------------------------------------------------------------------------------------------------------------------------------------------------------------------------------------------------------------------------------------------------------------------------------------------------------------------------------------------------------------------------------------------------------|---------|---------|--------------------------|-------|
| ACMG-1  | canonical     | PSY1-circ2 | GGGGTAATATATGATGCGTTTTG<br>GGCCATCAACAAGTTCATCTGT<br>TCTTCTGCACCATAAGGGAATC<br>TACTAGCTGAGCTCAATTCTGT<br>CACGCCTTTCTCT                                                                                                                                                                                                                                                                                                                                                                           | 4327521 | 4328953 | splits:2:10:2<br>:C:P    | 0.051 |
| ACMG-2  | canonical     | PSY1-circ2 | TGGGCCATCAACAAGTTCATCT<br>GTTCTTCTGCACCATAAGGGAA<br>TCTACTAGCTGAGCTCAATTCT<br>GTCACGCCTTTCTCTGCCTCATC<br>AAAGAACTTTCT                                                                                                                                                                                                                                                                                                                                                                            | 4327521 | 4328953 | splits:1:1:1:<br>C:P     | 0.024 |
| ACBR-1  | non-canonical | PSY1-circ4 | CGTACCAGCAACATAATAACAA<br>TAAAGGTATAGTTCGTCGAAGT<br>TTTTAAGTTGTTGTAGTCATTGG<br>CTTCAATCTCATCTAGTATTTTG<br>CGGTACAAGAC<br>AGAAAAGGCGTGACAGAATTGA<br>GCTCAGCTAGTAGATTCCCTTA<br>TGGTGCAGAAGAACAGATGAA<br>CTTGTTGATGGCCAAACGCAT<br>CATATATTACCCCGG<br>AGTTCCTTGATGAGGCAGAGGA<br>AGGCGTGACAGAATTGAGCTC<br>AGCTAGTAGATTCCTCCATTC<br>AGAGATATGATTGAAGGAATGC<br>GTATGGACTTGAGA                                                                                                                           | 4328061 | 4329710 | splits:2:2:2:<br>C:P     | 0.046 |
|         | canonical     | PSY1-circ2 |                                                                                                                                                                                                                                                                                                                                                                                                                                                                                                  | 4327521 | 4328953 | splits:1:31:1<br>2:C:P   | 0.023 |
|         | canonical     | PSY1-circ1 |                                                                                                                                                                                                                                                                                                                                                                                                                                                                                                  | 4328007 | 4328953 | splits:1:22:1<br>2:C:P   | 0.023 |
| ACBR-2  | canonical     | PSY1-circ2 | CCACCTATCTAAGGCTGCCGGG<br>GTAATATATGATGCGTTTGGGC<br>CATCAACAAGTTCATCTGTTCTT<br>CTGCACCATAAGGGAATCTACT<br>AGCTGAGCTCAA<br>TATGAAGAAACAAATACATAGG<br>GCAAGAAAGTTCTTTGGCCAT<br>TTGACATGCTCGATGGTGCTTT<br>GTCCGATACAGTTTCTAACTTTC<br>CAGTTGATATTC<br>TACTGAGAACGACAAGCTCAAT<br>ACAAGGTTATTTTGCCAGAATA<br>GTAGACAAAGGTGATAAATAA<br>GAGAACTAAAGATACGAGG<br>TATGGGATATTGTAA                                                                                                                             | 4327521 | 4328953 | splits:2:33:1<br>2:C:P   | 0.05  |
|         | non-canonical | PSY1-circ5 |                                                                                                                                                                                                                                                                                                                                                                                                                                                                                                  | 4327629 | 4328903 | splits:1:1:1:<br>C:P     | 0.025 |
|         | ciRNA         |            |                                                                                                                                                                                                                                                                                                                                                                                                                                                                                                  | 4329384 | 4329616 | splits:1:1:1:<br>C:P     | 0.025 |
|         | canonical     | PSY1-circ2 | GGGCCATCAACAAGTTCATCTG<br>TTCTTCTGCACCATAAGGGAAT<br>CTACTAGCTGAGCTCAATTCTG<br>TCACGCCTTTCTCTGCCTCATCA<br>AAGAACTTTCTT<br>CAGAATTGAGCTCAGCTAGTAG<br>ATTCCCTCCATTGAGAGATATG<br>ATTGAAGGAATGCGTATGGACT<br>TGAGAAAATCGAGATACAAAA<br>ACTTCGACGAACTA<br>ATATTACCCCGGCAGCCTTAGA<br>TAGGTGGGAAAATAGGCTAGA<br>AGATGTTTTCAATGGGCGGCCA<br>TTTGACATGCTCTACCTATTCCG<br>GGGAATTTGGGCT<br>CACTCATCAACCCAACCGTACC<br>AGCAACATAATAACAATAAAGG<br>ACAAGAGATTTTGCATATGCAA<br>TAGGTAATGCAATCAACTTCTTT<br>GATTTGCTCACA | 4327521 | 4328953 | splits:10:11<br>6:33:C:P | 0.248 |
|         | canonical     | PSY1-circ1 |                                                                                                                                                                                                                                                                                                                                                                                                                                                                                                  | 4328007 | 4328953 | splits:5:76:3<br>3:C:P   | 0.124 |
|         | non-canonical | PSY1-circ6 |                                                                                                                                                                                                                                                                                                                                                                                                                                                                                                  | 4326837 | 4327645 | splits:2:2:2:<br>C:P     | 0.05  |
|         | non-canonical | PSY1-circ7 |                                                                                                                                                                                                                                                                                                                                                                                                                                                                                                  | 4328082 | 4329784 | splits:2:2:3:<br>C:P     | 0.05  |

|                   |            |  |                                                                                                                        |         |         |                         |       |
|-------------------|------------|--|------------------------------------------------------------------------------------------------------------------------|---------|---------|-------------------------|-------|
| ACRed-1           |            |  | GTTTCTTCATAAAGATTCTCCAT<br>TTATCGGTCACCCCTTCCAGCAA<br>ATATATCTTCATCGGATAGACCT<br>GCCTCATCAAAGAACTTTCTTG<br>CCCTATGTATT | 4328811 | 4328912 | splits:2:2:2:<br>C:P    | 0.05  |
| non-<br>canonical | PSY1-circ8 |  | GCCATCAACAAGTTCATCTGTT<br>CTTCTGCACCATATCTTCTCCAA<br>CATCTCTGAGTATGTTAGTTAAT<br>TGATTTGCGATCCCCAGAGCCA<br>AAGCAGCATTAA | 4327521 | 4328242 | splits:1:116:<br>83:C:P | 0.025 |
| canonical         | PSY1-circ3 |  | ACGAACTATACCTTTATTGTTAT<br>TATGTTGCTGGTACGGTTGGGT<br>TGATGAGTGTCCAATTATGGG<br>TATCGCCCCTGAAATAGGCTAG<br>AAGATGTTTTCA   | 4327600 | 4328148 | splits:1:1:1:<br>C:P    | 0.025 |
| non-<br>canonical | PSY1-circ9 |  | AGCTCATTTTCTATATTTTGAT<br>ATGTAATATAGCAAAAAAAT<br>TATGTGCGTAAAAACACAGCTTT<br>GTACTTACAAAGAACAACGGA<br>AGCTAAATACGG     | 4328244 | 4328740 | splits:1:1:1:<br>C:P    | 0.025 |
| ciRNA             |            |  |                                                                                                                        |         |         |                         |       |

|                   |             |  |                                                                                                                       |         |         |                         |       |
|-------------------|-------------|--|-----------------------------------------------------------------------------------------------------------------------|---------|---------|-------------------------|-------|
| canonical         | PSY1-circ2  |  | GAAAGGCGTGACAGAATTGAG<br>CTCAGCTAGTAGATTCCTTAT<br>GGTGCAGAAGAACAGATGAAC<br>TTGTTGATGGCCCAAACGCATC<br>ATATATTACCCCGGC  | 4327521 | 4328953 | splits:6:121:<br>20:C:P | 0.151 |
| non-<br>canonical | PSY1-circ10 |  | ATTGAAGCCAATGACTACAACA<br>ACTTCACAAAGAGAGCATATGT<br>GAGCAAATCAAAGAAGTCTACT<br>TGCTCAAGATGAATTAGCACA<br>GGCAGGTCTATCC  | 4328776 | 4329742 | splits:4:4:4:<br>C:P    | 0.101 |
| non-<br>canonical | PSY1-circ11 |  | CCACTCTCAAACAAAATTACCC<br>ACTTTCTTTTTGTACCTTCCAA<br>ACTTTACTTAGTTTATAGAAAAT<br>AAATTACTCCTAGTAGATTCCC<br>ACTAGAGAATA  | 4326363 | 4326466 | splits:2:2:2:<br>C:P    | 0.05  |
| non-<br>canonical | PSY1-circ12 |  | AAGACGTTTAACTTAGGAACTA<br>TGCTAATGACTCCCGAGAGAAG<br>AAGGGCTATCTGGGCAATATAT<br>GTATGGTGCAGAAGGCAGCCTT<br>GGTGAAGAGGCAA | 4326775 | 4327097 | splits:2:2:11<br>7:C:P  | 0.05  |
| non-<br>canonical | PSY1-circ13 |  | CCGATAAATGGAGAATCTTTAT<br>GAAAGGGCTATCTGGGCAATAT<br>ATGTATGGTGCAGAAGAACAG<br>ATGAACTTGTTGATGGCCCAA<br>CGCATCATATATTA  | 4327075 | 4328870 | splits:2:2:2:<br>C:P    | 0.05  |
| non-<br>canonical | PSY1-circ14 |  | ACCCAACCGTACCAGCAACATA<br>ATAACAATAAAGGTATCTCAAT<br>TCTGTACGCCTTTCTCTGCCTC<br>ATCAAAGAACTTTCTTGCCCTAT<br>GTATTTGTTTC  | 4328078 | 4328934 | splits:1:1:1:<br>C:P    | 0.025 |
| ACRed-2           |             |  |                                                                                                                       |         |         |                         |       |

**Supplementary Table 4 Fruit color of PSY1-circ1 transgenic tomatoes (Ailsa Craig and microTom)**

a. Fruit color of *PSY1-circ1* overexpression lines (AC, T0 generation)

| Fruit color | OE lines                                    | Total |
|-------------|---------------------------------------------|-------|
| Yellow      | OE5, OE8, OE11, OE19, OE21, OE23, OE26      | 7     |
| Red         | OE3, OE4, OE7, OE12, OE13, OE14, OE15, OE28 | 8     |

b. Fruit color of *PSY1-circ1* overexpression lines (microTom, T0 generation)

| Fruit color | OE lines                                                                                                                                     | Total |
|-------------|----------------------------------------------------------------------------------------------------------------------------------------------|-------|
| Yellow      | OE14, OE16, OE38, OE40, OE52, OE53                                                                                                           | 6     |
| Red         | OE1, OE9, OE11, OE15, OE17, OE18, OE19, OE22, OE23, OE24, OE27, OE28, OE29, OE30, OE35, OE36, OE41, OE43, OE44, OE45, OE50, OE51, OE55, OE56 | 24    |

c. Fruit color of *PSY1-circ1* overexpression lines (microTom, hygromycin-resistant T1 generation plants)

|              | OE lines | Yellow progenies | Red progenies |
|--------------|----------|------------------|---------------|
| Yellow lines | OE16     | 12               | 0             |
|              | OE38     | 10               | 3             |
|              | OE53     | 8                | 0             |
| Red lines    | OE1      | 9                | 18            |
|              | OE9      | 0                | 7             |
|              | OE11     | 4                | 2             |
|              | OE18     | 0                | 15            |
|              | OE44     | 0                | 11            |

**Supplementary Table 5 Primers used in this study**

| Name        | Sequence (5'-3')        | Annotation                                                        |
|-------------|-------------------------|-------------------------------------------------------------------|
| PSY1-cF1    | GTTGGAGAAGATGCCAGAAG    | Divergent primers for <i>PSY1-circ1</i>                           |
| PSY1-cR1    | CCATACGCATTCTTCAATC     |                                                                   |
| PSY1-IF1    | TTGGTTTGCCTGTCTGTG      | Convergent primers for <i>PSY1</i>                                |
| PSY1-IF2    | TGTATCGGACAAAGCACC      |                                                                   |
| PDS-cF1     | CTATGTCAAAGGCACTCAACT   | Divergent primers for <i>PDS-circ1</i>                            |
| PDS-cR1     | CCTAATTCTCCAAACAGGTTCT  |                                                                   |
| PDS-IF1     | GACAGGGTGACAGATGAGGT    | Convergent primers for <i>PDS</i>                                 |
| PDS-IF2     | CACAAAAGCATCTCCCTCG     |                                                                   |
| ZISO-cF1    | TATGAGGATTACCAGGCATC    | Divergent primers for <i>ZISO-circ1~2</i>                         |
| ZISO-cR1    | CCATAACTGCACTCCATCGT    |                                                                   |
| ZISO-IF1    | AAATGCCACCAAAGAGC       | Convergent primers for <i>ZISO</i>                                |
| ZISO-IR1    | GTCAACAGCCGCTACCTC      |                                                                   |
| HP2-cF1     | GATGGCTTCCTTGCCTTGT     | Divergent primers for <i>HP2-circ1~4</i>                          |
| HP2-cR1     | GGCGTGGATGTTGTTTGAG     |                                                                   |
| HP2-IF1     | TTGGCAGTGTTGATGGTG      | Convergent primers for <i>HP2</i>                                 |
| HP2-IR1     | GTTTGGAGGTGCTACGAAG     |                                                                   |
| PSY1-div-F  | TCAGCTAGTAGATCCCTCCATTC | Divergent primers for <i>PSY1-circ1</i><br>(for Real-time PCR)    |
| PSY1-div-R  | CCTTTGATTTCAGGGGCGATAC  |                                                                   |
| PSY1-con-F  | GGACAAGTTTCATGGAATCAGT  | Convergent primers for <i>PSY1</i> (for<br>Real-time PCR)         |
| PSY1-con-R  | TGGAGTAGCCAAAATAGCAGAC  |                                                                   |
| PDS-div-F   | TGCTATGTCAAAGGCACTCAAC  | Divergent primers for <i>PDS-circ1</i><br>(for Real-time PCR)     |
| PDS-div-R   | CATGCAGCTACCTGAAGAAACC  |                                                                   |
| PDS-con-F   | GCCGGTGACTACACGAAACAG   | Convergent primers for <i>PDS</i> (for<br>Real-time PCR)          |
| PDS-con-R   | ACGCTTGCTTCCGACAACCTC   |                                                                   |
| HP2/1-div-F | CAGGTTTGACGAGAAGAGAGTGC | Divergent primers for <i>HP2-circ1,3,4</i><br>(for Real-time PCR) |
| HP2/1-div-R | TCAACAGGTGATGTCGGTCC    |                                                                   |
| HP2/2-div-F | TGATGGCTTCCTTGCCTTGT    | Divergent primers for <i>HP2-circ2</i><br>(for Real-time PCR)     |
| HP2/2-div-R | CAGCATTTCCGGATACCTTCTC  |                                                                   |
| HP2-con-F   | AGCTATTGACCGCCATAGACAG  | Convergent primers for <i>HP2</i> (for<br>Real-time PCR)          |
| HP2-con-R   | GGGTGGAAGAGGAAGGAACA    |                                                                   |
| ETR4-cF1    | CAAGGAGACATCTGGGTAATC   | Divergent primers for <i>ETR4-circ1~2</i>                         |
| ETR4-cR1    | GCACACAGTGAAACTCAAGC    |                                                                   |
| ETR4-IF1    | TGAGCAGCGGCTTCTTGT      | Convergent primers for <i>ETR4</i>                                |
| ETR4-IR1    | GCACACAGTGAAACTCAAGC    |                                                                   |
| ACO6-cF1    | CCAAAGTTAGCAACTACCCACC  | Divergent primers for <i>ACO6-circ1~4</i>                         |
| ACO6-cR1    | CTTGCCACCATTCCTTG       |                                                                   |
| ACO6-IF1    | ATGGTGGCAAGTAAAGGC      | Convergent primers for <i>ACO6</i>                                |
| ACO6-IR1    | AGTAGGACCCTTTGAGCC      |                                                                   |
| ZISO-div-F  | ACTAGAGGTAGCGGCTGTTGAC  | Divergent primers for                                             |

|                |                           |                                                                                                                     |
|----------------|---------------------------|---------------------------------------------------------------------------------------------------------------------|
| ZISO-div-R     | GGGAAAGCATTACAATCTGTGG    | <i>ZISO-circ1~2</i> (for Real-time PCR)                                                                             |
| ZISO-con-F     | ATGGGGACCGGAGGTTAGC       | Convergent primers for <i>ZISO</i> (for Real-time PCR)                                                              |
| ZISO-con-R     | GCATAATGGGGTGGAGGAAGTA    |                                                                                                                     |
| SPL12-cF1      | GGAAATGGGAGTGTCAAAG       | Divergent primers for <i>SPL12-circ1~2</i>                                                                          |
| SPL12-cR1      | CAGCCAATGTATGGTAACGAG     |                                                                                                                     |
| SPL12-IF1      | AGCAGGTTCCATAGCGTGTC      | Convergent primers for <i>SPL12</i>                                                                                 |
| SPL12-IR1      | CAGCCAATGTATGGTAACGAG     |                                                                                                                     |
| Actin-con-F    | GTCCTCTTCCAGCCATCCAT      | Convergent primers for <i>actin</i> (for Real-time PCR)                                                             |
| Actin-con-R    | ACCACTGAGCACAATGTTACCG    |                                                                                                                     |
| F1             | ATTTCTTGGTTGGTAGGGTG      | Primers used for identification of circRNA and linear RNAs in PSY1-circ1 overexpression plants.                     |
| R1             | TGCGAGGTTCAATTTCTTGGT     |                                                                                                                     |
| R2             | ATCGACCTAGAAATACTCAACAC   |                                                                                                                     |
| R3             | CTGCCTGTGCTAATTCATCTTG    |                                                                                                                     |
| cF1            | GTTGGGTTGATGAGTGTTC       |                                                                                                                     |
| cR1            | CAAGTCCATACGCATTCC        |                                                                                                                     |
| PSY1-circ-v-IF | CATTTCTTGGTTGGTAGGGTG     | Primers used for identification of linear RNAs generated from PSY1-circ1 overexpression vector. (for Real-time PCR) |
| PSY1-circ-v-IR | CTACAAACATTTCCGCTAGGCTG   |                                                                                                                     |
| PDS-circ-v-IF  | GAACTTATGGACAACCCAATCAC   | Primers used for identification of linear RNAs generated from PDS-circ1 overexpression vector. (for Real-time PCR)  |
| PDS-circ-v-IR  | CGTAGAATCTACCAGAAAAGACAGC |                                                                                                                     |
